# Supplementary material
Source: PubMed Central journal article supplement (PMC4325533)
Supplement: supp_czt104_czt104_Chinese.pdf [file supp_czt104_czt104_Chinese.pdf]

## 非洲急性肺炎的社区病例管理研究：现有证据检验

在撒哈拉以南非洲国家，急性肺炎每年大概造成 75 万儿童死亡。缺乏及时有效的治疗是造成这种结果的很重要方面。急性肺炎的社区病例管理雇佣受过训练的社区医疗工作者给村庄里可能感染了急性肺炎的孩子发放抗生素。这个策略在低收入和中等收入国家取得了成效，世界卫生组织和联合国儿童基金会最近开始鼓励对其他疾病也采取社区病例管理的方法。对这种方式的推荐基于三个综合比较分析，这三个综合比较分析显示社区病历管理法对减少儿童由急性肺炎所导致的死亡率和发病率是有效的，但大多数的综合比较分析是在亚洲国家进行的。目前研究的问题在于社区病例管理策略在亚洲国家和撒哈拉以南非洲国家的实施有很大不同，这些不同部分是因为疟疾流行程度。因此，我们进行了一项描述性的同步以系统性得检验撒哈拉以南非洲的的社区病例管理。研究结果显示，不论社区病历管理是否涵盖其他疾病，没有证据显示这种方法的效果和有效性。社区医疗工作者在清点呼吸率方面遇到困难。当他们被要求处理多种疾病或是严重患病的儿童时他们就更偏离操作指导。因此社区病例管理出现了过度处理和不足的问题，以及潜在的不良后果如严重疾病致死性的上升和抗生素抗性的产生。现有的效果、有效性和成功实施因素方面证据的缺乏，再加上社区医疗工作者不严格执行操作规程，使我们需要做一个全面的检验才能判断在撒哈拉以南非洲国家实行社区病例管理的合理性。
