# Supplementary material
Source: PubMed Central journal article supplement (PMC4325533)
Supplement: supp_czt104_czt104_French.pdf [file supp_czt104_czt104_French.pdf]

# La gestion communautaire de la pneumonie en Afrique: une analyse des bases factuelles

Accepté le 25 novembre 2013

Chaque année, la pneumonie est responsable d'environ 750 000 morts infantiles dans les pays d'Afrique sub-saharienne (ASS). Le manque d'accessibilité à des traitements rapides et efficaces est l'une des causes principales de ce fardeau. La prise en charge des cas de pneumonie dans la communauté (PECpe) implique des agents de santé communautaires (ASC), ces derniers peuvent, dans les villages, administrer des antibiotiques aux enfants suspectés d'avoir contracté la pneumonie. Cette stratégie prend de plus en plus d'ampleur dans les pays à faible et moyen revenu. L'Organisation mondiale de la Santé (OMS) et le Fonds des Nations unies pour l'enfance (UNICEF) ont récemment encouragé les pays à élargir le principe de la prise en charge des cas dans la communauté à d'autres maladies.

Nous basons nos recommandations en faveur de la PECpe sur trois méta-analyses justifiant de son efficacité à réduire la mortalité infantile imputable à la pneumonie, le problème est que la plupart de ces méta-analyses ont été menées dans des pays asiatiques. Les stratégies de prise en charge des cas dans la communauté ont été mises en place de manière très différentes en Asie et dans les pays d'ASS, ceci est en partie dû à la prévalence du paludisme. C'est pourquoi nous avons fait une synthèse descriptive systématique des bases factuelles de la PECpe dans les pays d'ASS. D'après les résultats, il manque des éléments justifiant de son efficacité, et ce même si la prise en charge est intégrée à d'autres maladies. Les ASC rencontrent des difficultés à mesurer la fréquence respiratoire. Leur appréciation au regard des lignes directrices est bien moindre lorsqu'ils ont à gérer plusieurs types de maladie ou encore des enfants avec des symptômes aigus. Les PECpe englobent ainsi les problèmes de sur-traitements et de traitements ratés avec des conséquences potentiellement négatives telles qu'une mortalité croissante dans les cas les plus sévères ou une résistance aux antibiotiques. Le manque d'éléments actuels montrant l'efficacité, l'utilité et les facteurs de succès des PECpe, couplé à un manque d'adhésion des ASC exige un examen minutieux de la légitimité à mettre en place la PECpe dans les pays de l'ASS.

Mots clés : prise en charge, santé communautaire, synthèse descriptive systématique, infections respiratoires aiguës

Abréviations : C-RCT : essai clinique randomisé par grappes, PECp : prise en charge des cas de paludisme dans la communauté, PECpe : prise en charge des cas de pneumonie dans la communauté, ASC : agents de santé communautaires, PEC-C : prise en charge intégrée des cas dans la communauté, PCIME : Prise en charge intégrée des maladies de l'enfant, OEMM : Outil d'évaluation des méthodes mixtes, TDR : test de diagnostic rapide, ASS : Afrique sub-saharienne, UNICEF : Fonds des Nations unies pour l'enfance, OMS : Organisation mondiale de la Santé
