# Supplementary material
Source: PubMed Central journal article supplement (PMC4325533)
Supplement: supp_czt104_czt104_Spanish.pdf [file supp_czt104_czt104_Spanish.pdf]

## **El tratamiento comunitario de los casos de neumonía en África: una revisión de la evidencia**

**Thomas Druetz, Kendra Siekmans, Sylvie Goosens, Vale'ry Ridde y Slim Haddad**

**Aceptado** 25 de noviembre de 2013

La neumonía causa alrededor de 750,000 muertes infantiles por año en los países del África subsahariana (ASS). La falta de acceso a tratamiento efectivo y oportuno es un contribuyente importante a esta carga. El tratamiento comunitario de los casos de neumonía (TCCn) utiliza trabajadores de salud comunitarios (TSCs) capacitados para administrar antibióticos para los presuntos casos de neumonía infantil en los pueblos. Esta estrategia ha estado ganando impulso en los países de bajos y medianos ingresos, y la Organización Mundial de la Salud y el Fondo de las Naciones Unidas para la Infancia han alentado recientemente a los países a ampliar el tratamiento comunitario de casos a otras enfermedades. Las recomendaciones en favor del TCCn se basan en tres meta-análisis que muestran su eficacia para reducir la mortalidad y la morbilidad infantil atribuibles a la neumonía, aunque la mayoría de los estudios en los meta-análisis se realizaron en países asiáticos. Esto es problemático, ya que las estrategias de tratamiento comunitario de casos han sido implementadas de maneras muy diferentes en los países de Asia y del ASS, en parte debido a las diferencias en la prevalencia de la malaria. Por lo tanto, se realizó una síntesis narrativa para revisar sistemáticamente la evidencia sobre TCCn en el ASS. Los resultados muestran que existe una falta de pruebas sobre su eficacia y efectividad en el ASS, independientemente de que el tratamiento de casos esté o no integrado con otras enfermedades. Los TSCs tienen dificultades para medir la frecuencia respiratoria. Su adhesión a las directrices es más pobre cuando deben tratar varias enfermedades o niños con síntomas graves. Así, el TCCn abarca cuestiones de exceso de tratamiento y de tratamiento no realizado, con consecuencias potencialmente negativas como el aumento de la letalidad en los casos graves y resistencia a los antibióticos. La actual falta de pruebas sobre su eficacia, efectividad y los factores que conducen a la implementación con éxito, junto con la pobre adherencia de los TSCs, exigen

un examen detallado de la legitimidad de la implementación del TCCn en países del ASS.

**Palabras Claves:**

tratamiento de casos, salud comunitaria, revisiones sistemáticas, infecciones respiratorias agudas

**Abreviaciones:**

ECA-G, ensayo controlado aleatorio grupal, TCCm, tratamiento comunitario de casos de malaria, TCCn, tratamiento comunitario de casos de neumonía, TSC, trabajador de salud comunitaria, TCCi, tratamiento comunitario de casos integrado, TIEI, tratamiento integrado de enfermedades infantiles, HVMM, herramienta de valoración de métodos mixtos, PRD, prueba rápida de diagnóstico para la malaria, ASS, África subsahariana, UNICEF, Fondo de las Naciones Unidas para la Niñez, OMS, Organización Mundial de la Salud

**MENSAJES CLAVES**

- Hay una falta de pruebas sobre los impactos de los tratamientos comunitarios de la malaria en la mortalidad y la morbilidad infantil en los países africanos, independientemente de si el tratamiento se integra o no con otras enfermedades.
- El rendimiento de los trabajadores de la salud comunitarios (TSCs) frente al tratamiento de la neumonía sufre de problemas relacionados con la medición de la frecuencia respiratoria, lo que lleva a graves problemas de exceso de tratamiento y de falta de tratamiento.
- Los planificadores de políticas en África deben obrar con suma cautela en la interpretación de la eficacia del tratamiento comunitario de casos de neumonía extrapolada de la literatura científica, porque la mayoría de los estudios se han realizado en los países asiáticos.
- Los enfoques innovadores para aumentar la adherencia de los TSCs a las directrices deben ser probados antes de integrar el tratamiento comunitario de casos a otras enfermedades, a saber, la malaria.
